# Supplementary material for: Combined experimental and theoretical investigation on the magnetic properties derived from the coordination of 6-methyl-2-oxonicotinate to 3d-metal ions
Source: Royal Society of Chemistry journal article supplement (doi:10.1039/d2dt00838f), 2022-01-01
Supplement: d2dt00838f1.pdf [file d2dt00838f1.pdf]

Supporting Information for:

## Combined Experimental and Theoretical Investigation on the Magnetic Properties Derived from the Coordination of 6-methyl-2- oxonicotinate to 3d-Metal Ions

Laura Razquin-Bobillo,<sup>a</sup> Oier Pajuelo-Corral,<sup>a</sup> Beñat Artetxe,<sup>b</sup> Andoni Zabala-Lekuona,<sup>a</sup> Duane Choquesillo-Lazarte,<sup>c</sup> Antonio Rodríguez-Diéguez,<sup>c</sup> Eider San Sebastian,<sup>a</sup> Javier Cepeda<sup>\*,a</sup>

<sup>a</sup> Departamento de Química Aplicada, Facultad de Química, Universidad del País Vasco/Euskal Herriko Unibertsitatea (UPV/EHU), 20018 Donostia-San Sebastián, Spain. <sup>b</sup> Departamento de Química Orgánica e Inorgánica, Facultad de Ciencia y Tecnología, Universidad del País Vasco/Euskal Herriko Unibertsitatea (UPV/EHU), 48940, Leioa, Spain. <sup>c</sup> Laboratorio de Estudios Cristalográficos, IACT, CSIC-Universidad de Granada, Avda. de las Palmeras 4, 18100 Armilla, Spain. <sup>d</sup> Departamento de Química Inorgánica, Facultad de Ciencias, Universidad de Granada, 18071 Granada, Spain.

Contents:

- S1. Chemical and thermal characterization of compounds.
- S2. FT-IR spectroscopy.
- S3. Powder X-ray diffraction analysis of as-synthesized compounds.
- S4. Structural details of compounds **1<sub>Mn</sub>-5<sub>Cu</sub>**.
- S5. Continuous Shape Measurements (CShMs).
- S6. Diffuse reflectance results.
- S7. DC magnetic susceptibility measurements.
- S8. AC magnetic susceptibility measurements.
- S9. CASSCF multiconfigurational calculations.
- S10. DFT calculations.
- S11. References.

## **S1. Chemical and thermal characterization of compounds.**

The thermal behaviour of all compounds has been studied by means of thermogravimetric/differential thermal analyses (TG/DTA) in order to further confirm the purity of the polycrystalline samples. As it can be seen in the TG curves (see Table S1), when the compounds are heated above room temperature, they show a loss of mass that is assigned to the solvent molecules in good agreement with the amount of solvent molecules found in X ray diffraction analyses. Above 300 °C, compounds **1Mn** and **5Cu** undergo one exothermic process each whereas two exothermic processes can be distinguished for compounds **2Co**, **3Ni** and **4Cu** as a consequence of the combustion of the organic molecules. The final residues agree well with the mass percentage expected for the oxides of the metal ions of which they are composed.

**Table S1.** DTA curves of compounds  $1_{\text{Mn}}-5_{\text{Cu}}$ .

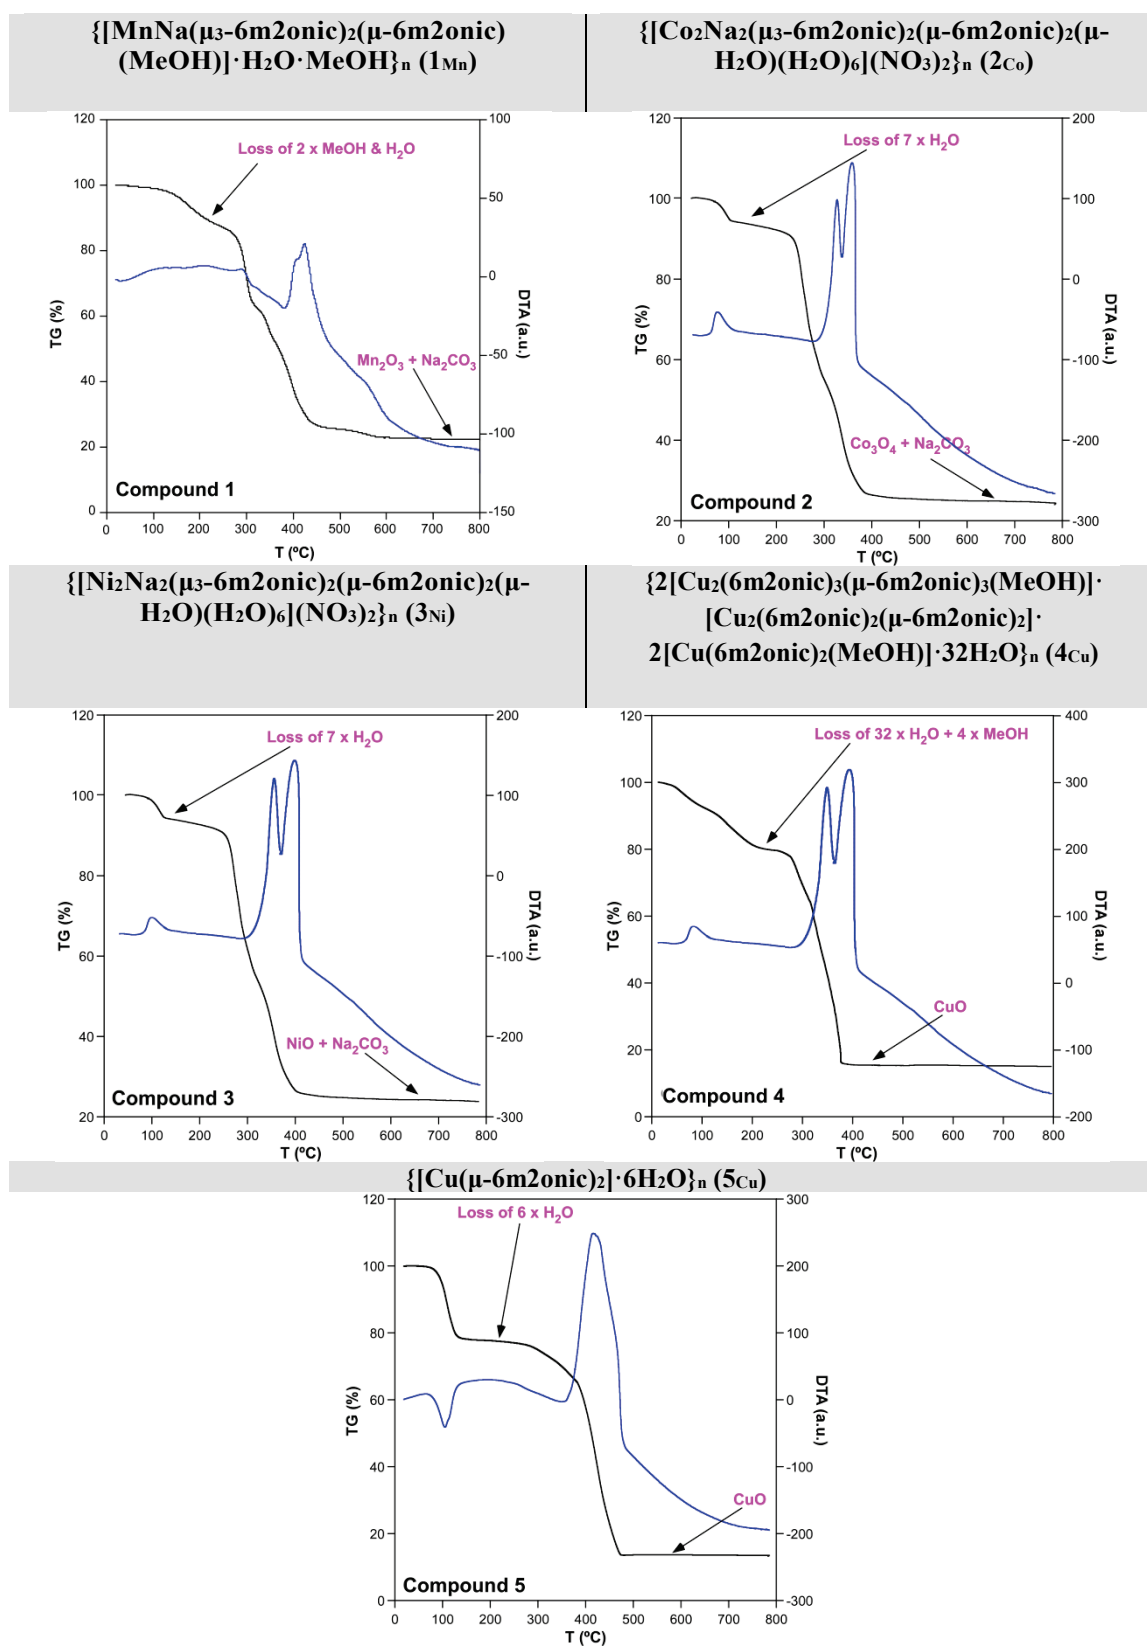

## S2. FT-IR spectroscopy

Infrared spectroscopy has been used for the initial characterisation of the compounds, as it reveals the presence of ligand copies in the synthesised complexes, as well as its coordination to metal, if any. The spectra obtained for complexes **1<sub>Mn</sub>-5<sub>Cu</sub>** show a similar pattern (Figure S1), which can be considered as the result of the ligand exhibiting the same tautomeric form in all compounds. In this regard, it should be mentioned that although the coordination mode of the 1H-2-oxo-6-methyl-nicotinate tautomer may be variable, compounds **1<sub>Mn</sub>-5<sub>Cu</sub>** all show signals corresponding to a chelate ring between the ketone and carboxylate groups, imposing the main similarity of the infrared spectra (presence of most of the bands).

In all the spectra, the first band appearing between 3500-3300  $\text{cm}^{-1}$  corresponds to the vibrational stress of the O-H bonds of the adsorbed water molecules in the samples by the environmental humidity (in the case of the free ligand) or of the crystallization water molecules (in the case of the compounds). This band is followed by a second, broader band between 3300-2300  $\text{cm}^{-1}$ , which corresponds to the vibrations of the O-H, N-H and C-H bonds of the ligand. It is significant that in the ligand spectrum this band is much more intense than with the compounds, as the inter- and intra-molecular hydrogen bonds between the ligand molecules vibrate more intensely. In particular, a broad band of the protonated carboxylate group is seen in the ligand and weak vibrational signals of the N-H and C-H pyridine ring are observed in all compounds. The sharp and strong bands appearing in the range 1725-1450  $\text{cm}^{-1}$  correspond to asymmetric vibrations of the carboxylate group and the C-C and C-N bonds of the aromatic ring, while the symmetric vibrations of the carboxylate group appear in the range 1400-1200  $\text{cm}^{-1}$ . Again, the spectrum of the free ligand shows a strong broad band between 1725-1665  $\text{cm}^{-1}$  and narrower at 1508  $\text{cm}^{-1}$ , an event that corresponds to the protonation of the carboxylate group. It should also be noted that some symmetric vibrations of the carboxylate group are rather impeded in the compounds by the coordination form adopted in the compounds. The remaining bands of smaller wavenumbers can be assigned to the distortions occurring in the aromatic ring, among which M-O bonds (M = Mn, Co, Ni, Cu) are also seen.

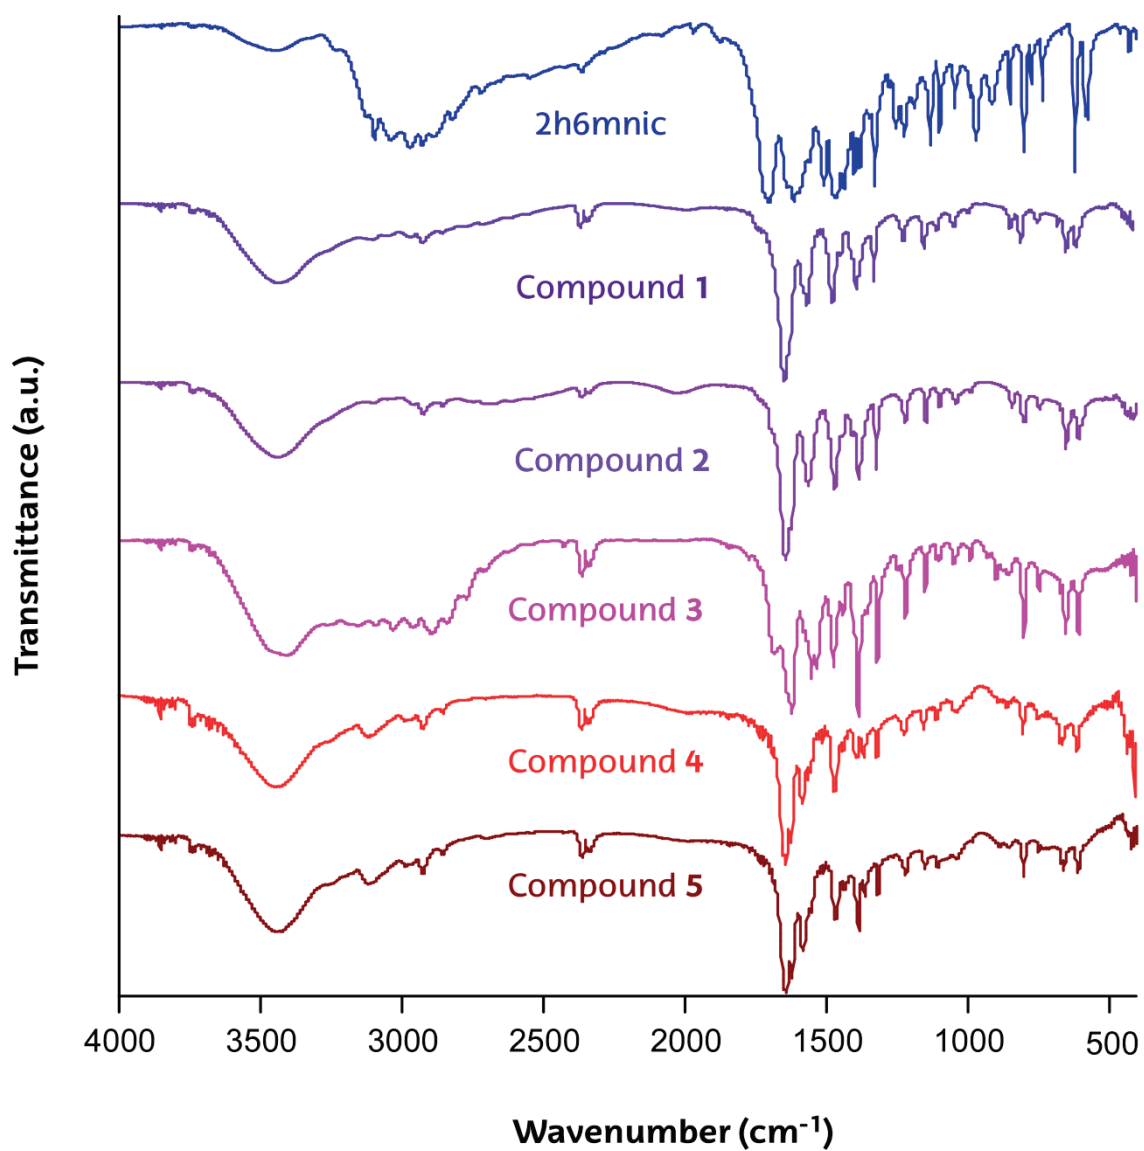

**Figure S1.** IR spectra of H<sub>2</sub>h<sub>6</sub>mnic ligand and compounds **1**<sub>Mn</sub>-**5**<sub>Cu</sub>.

### S3. Powder X-ray diffraction analysis of as-synthesized compounds.

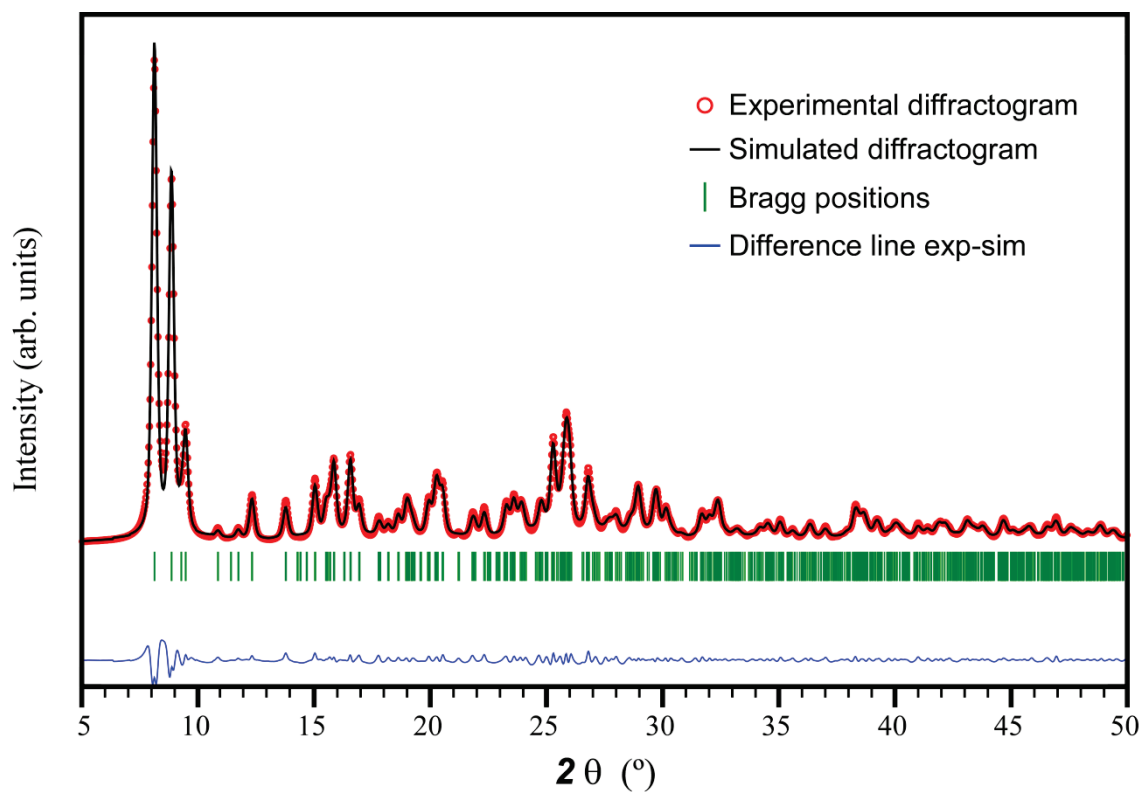

Figure S2. Simulated and experimental PXRD of  $1_{Mn}$  with the full profile pattern matching analyses.

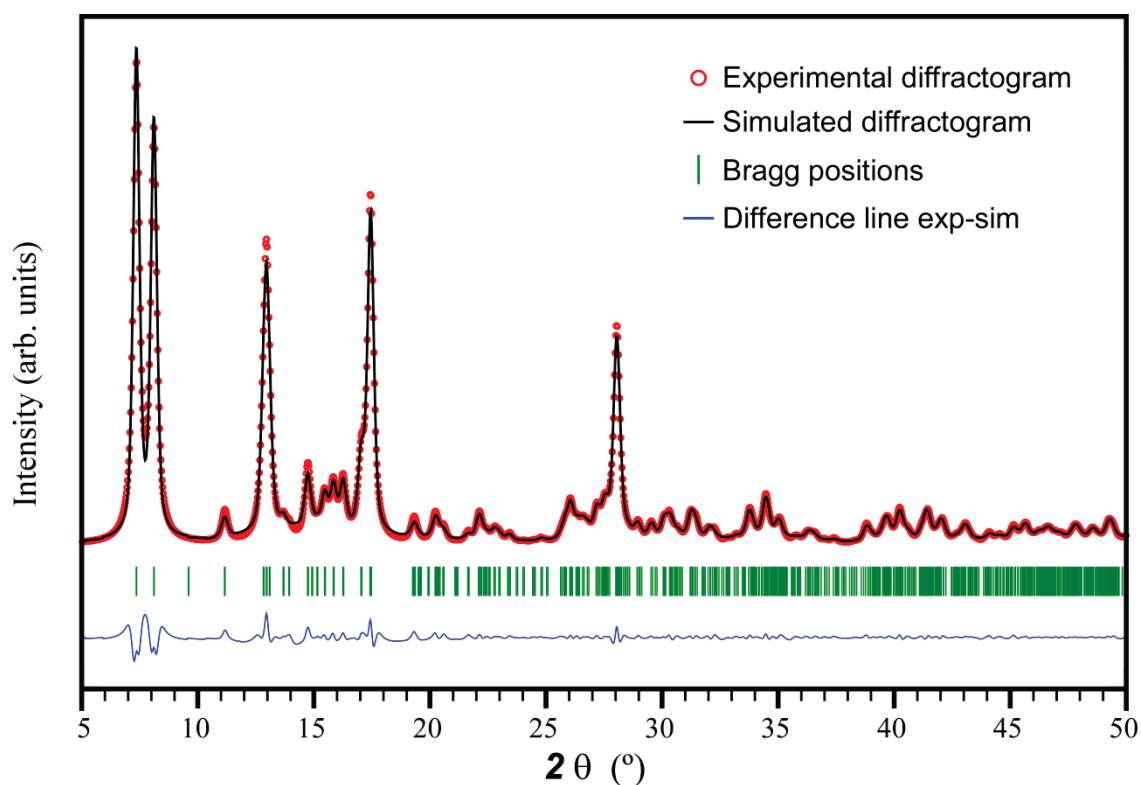

Figure S3. Simulated and experimental PXRD of  $2_{Co}$  with the full profile pattern matching analyses.

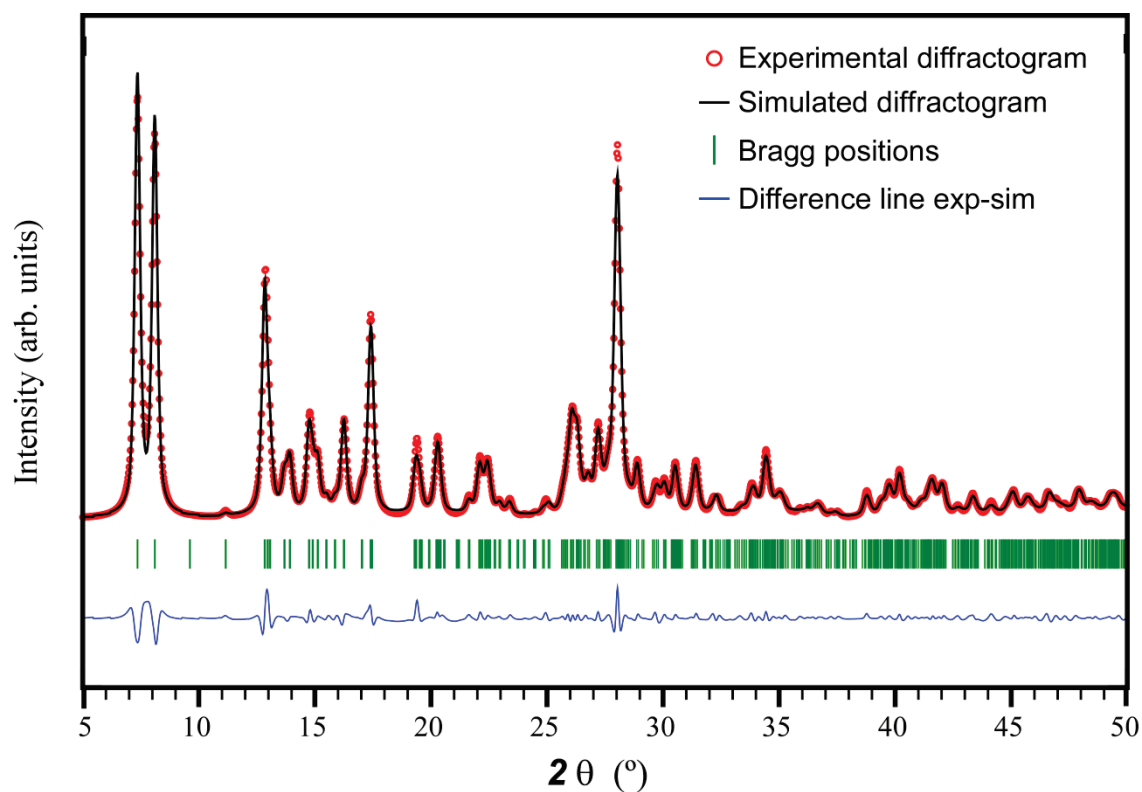

**Figure S4.** Simulated and experimental PXRD of  $3\text{Ni}$  with the full profile pattern matching analyses.

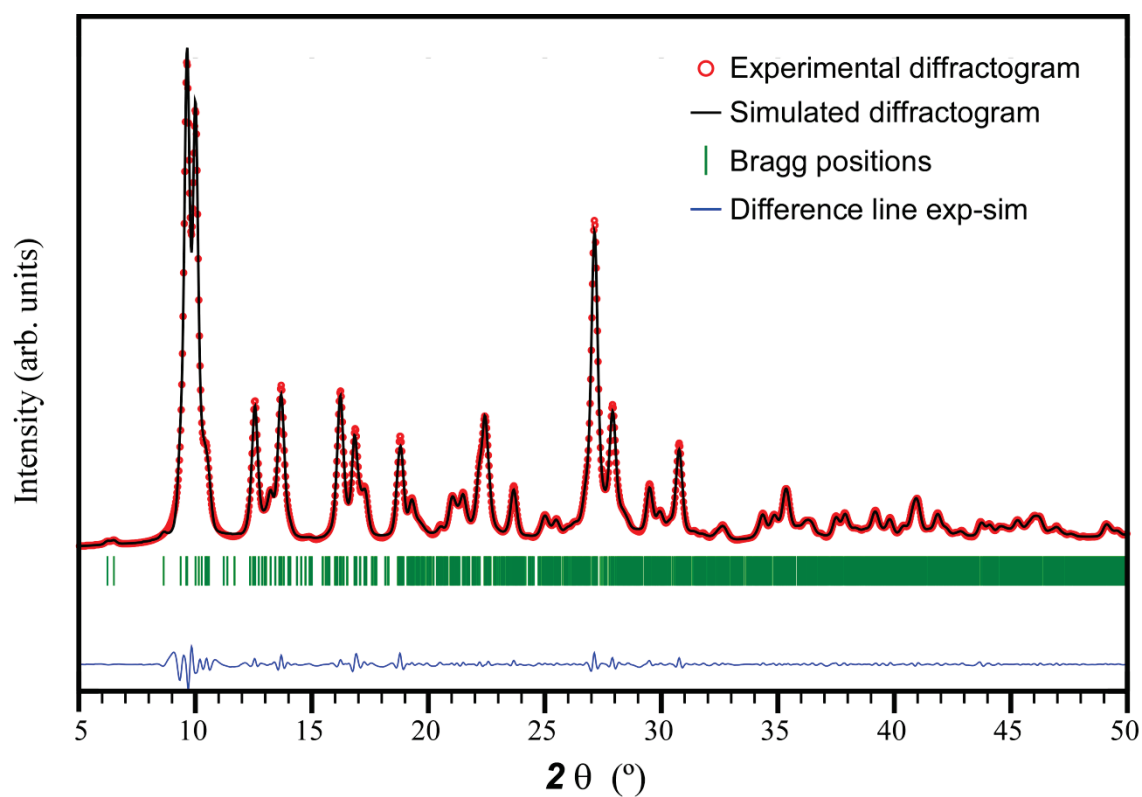

**Figure S5.** Simulated and experimental PXRD of  $4\text{Cu}$  with the full profile pattern matching analyses.

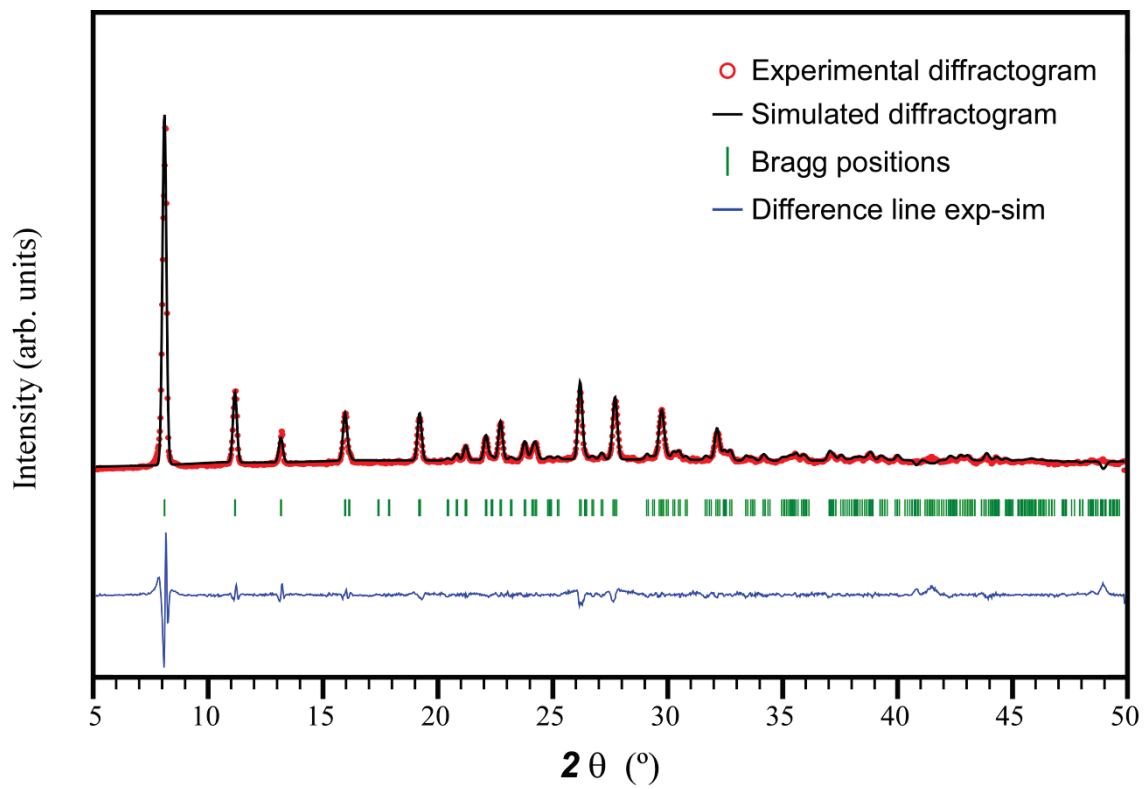

**Figure S6.** Simulated and experimental PXRD of  $5\text{Cu}$  with the full profile pattern matching analyses.



#### S4. Structural details of compounds $1_{Mn}$ - $5_{Cu}$

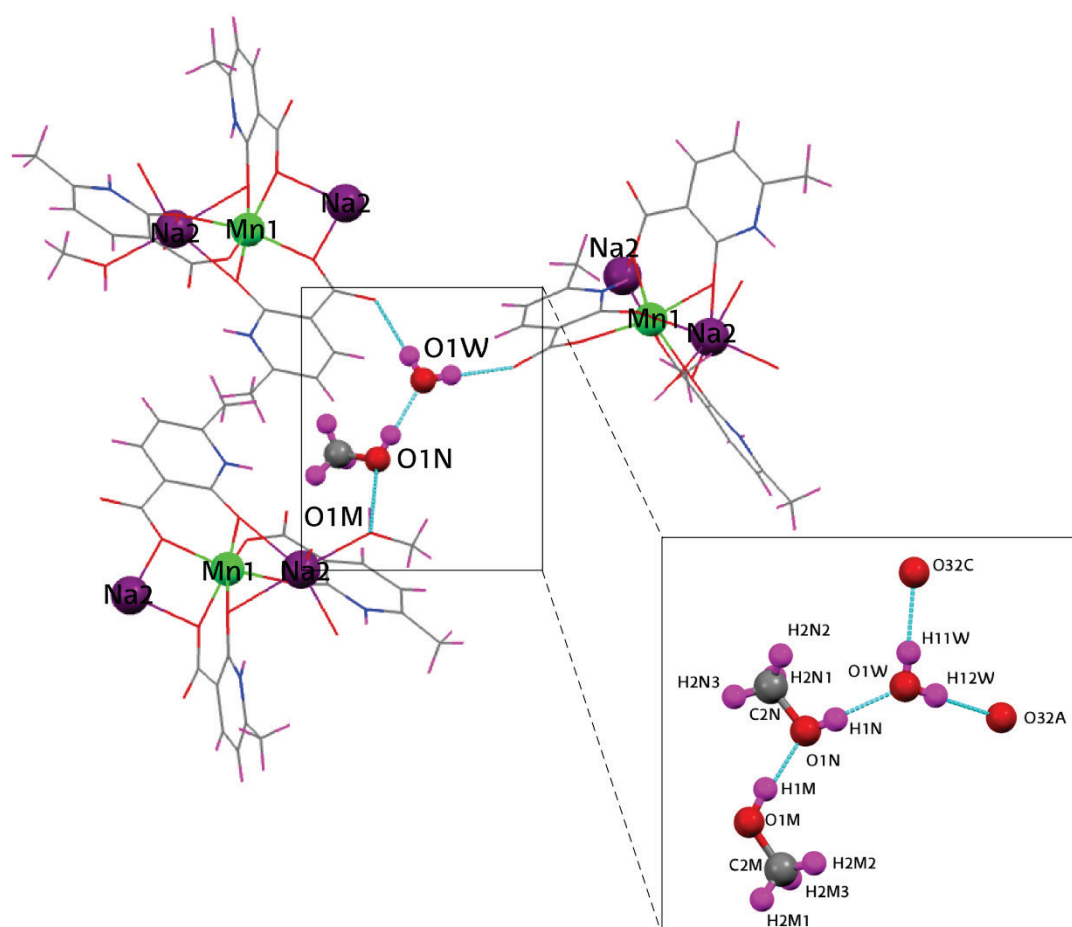

**Figure S7.** View of the hydrogen bonds formed between the chains of compound  $1_{Mn}$ . Inset: Atom numbered solvent and ligand molecules participating in the H-bond network.

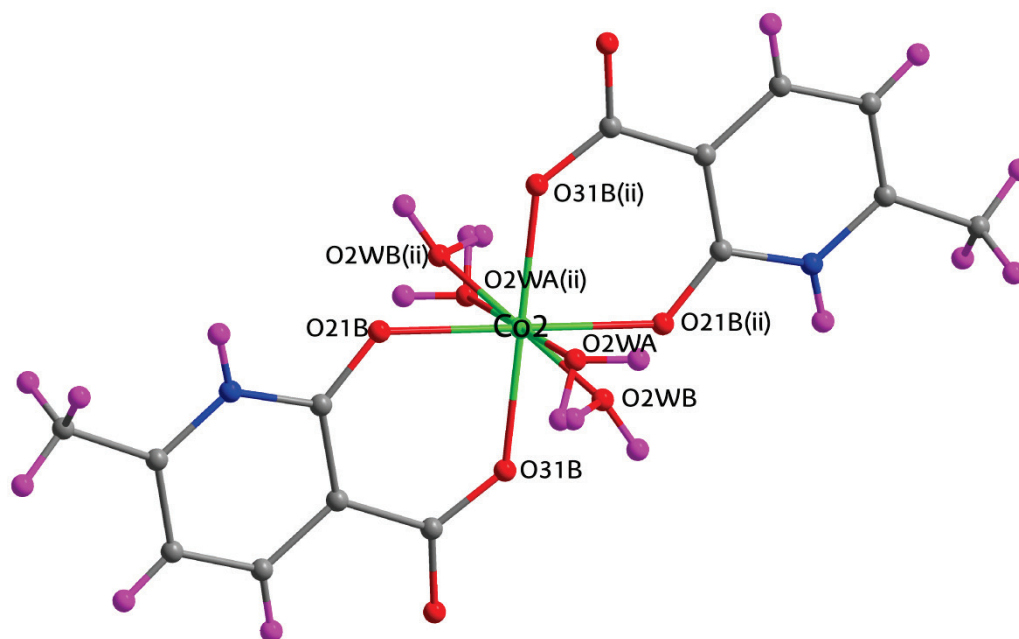

**Figure S8.** View of the disorder of the molecules O2wA and O2wB for Co2 atom.

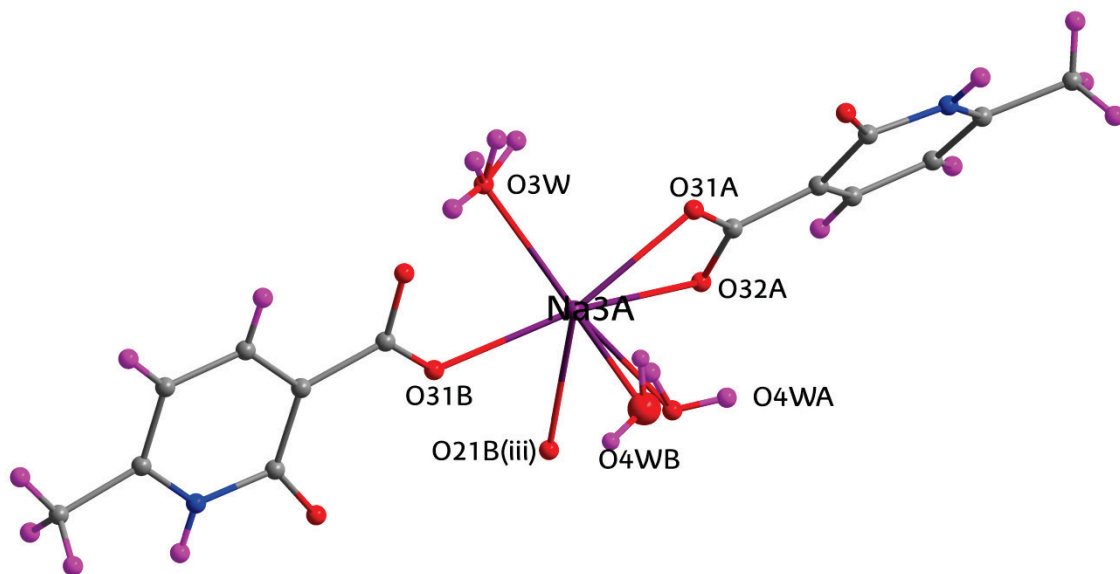

**Figure S9.** View of the disorder of the molecules O4wA and O4wB for Na3A atom.

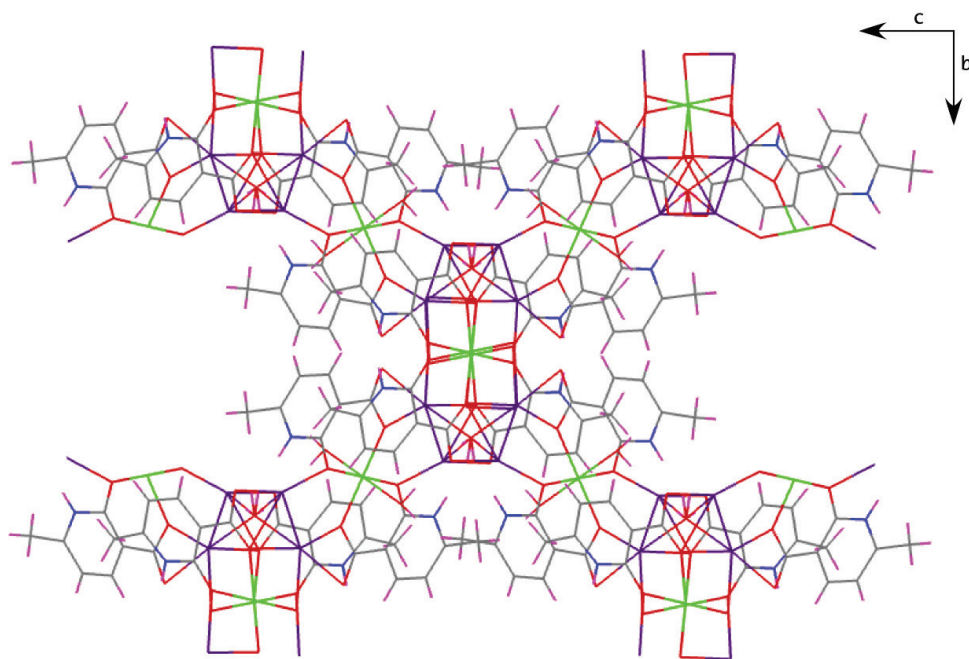

**Figure S10.** View of the 3D network of  $2Co$  along crystallographic  $a$  axis. Nitrate anions have been omitted for clarity.

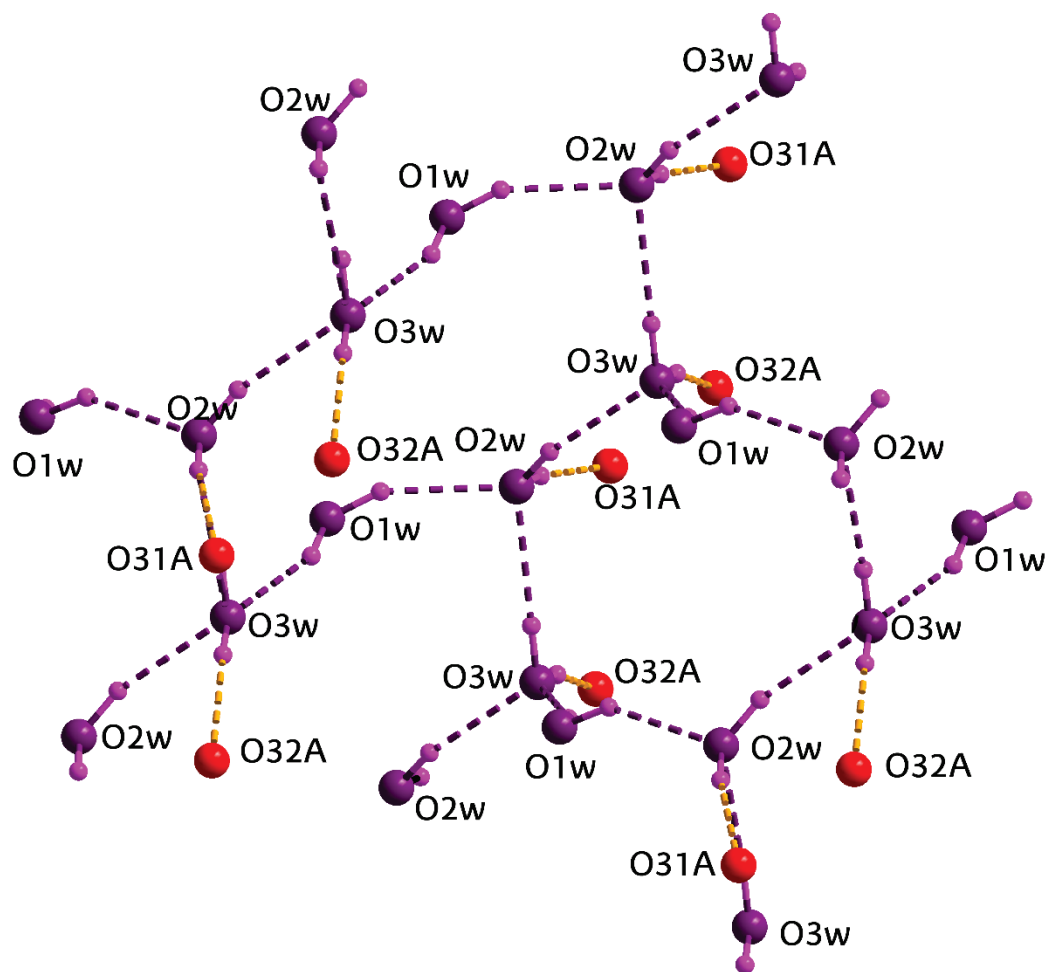

**Figure S11.** View of the hydrogen bonded water clusters crystallised in compound  $5_{Cu}$ .

## S5. Continuous Shape Measurements (CShMs).

**Table S2.** CShMs for the coordination environment of compounds **1<sub>Mn</sub>**, **2<sub>Co</sub>**, **4<sub>Cu</sub>** and **5<sub>Cu</sub>**.  
The lowest values for each ion are shown in bold to indicate best fits.

Codes:

|        |       |                                |
|--------|-------|--------------------------------|
| HP-6   | 1 D6h | Hexagon                        |
| PPY-6  | 2 C5v | Pentagonal pyramid             |
| OC-6   | 3 Oh  | Octahedron                     |
| TPR-6  | 4 D3h | Trigonal prism                 |
| JPPY-6 | 5 C5v | Johnson pentagonal pyramid J12 |

| Structure [ML6]              | HP-6   | PPY-6         | OC-6         | TPR-6  | JPPY-6 |
|------------------------------|--------|---------------|--------------|--------|--------|
| <b>1<sub>Mn</sub> (Mn1)</b>  | 33.126 | 20.671        | <b>2.565</b> | 7.208  | 24.521 |
| <b>1<sub>Mn</sub> (Na2)</b>  | 29.682 | 20.917        | <b>4.380</b> | 8.842  | 24.496 |
| <b>2<sub>Co</sub> (Co1)</b>  | 31.922 | 29.364        | <b>0.129</b> | 16.295 | 32.571 |
| <b>2<sub>Co</sub> (Co2)</b>  | 30.222 | 28.640        | <b>0.278</b> | 16.174 | 31.743 |
| <b>2<sub>Co</sub> (Na3A)</b> | 47.382 | <b>29.034</b> | 38.934       | 34.949 | 32.934 |
| <b>5<sub>Cu</sub> (Cu1)</b>  | 31.212 | 28.910        | <b>2.708</b> | 18.400 | 31.074 |

Codes:

|         |       |                              |
|---------|-------|------------------------------|
| PP-5    | 1 D5h | Pentagon                     |
| vOC-5   | 2 C4v | Vacant octahedron            |
| TBPY-5  | 3 D3h | Trigonal bipyramid           |
| SPY-5   | 4 C4v | Spherical square pyramid     |
| JTBPY-5 | 5 D3h | Johnson trigonal pyramid J12 |

| Structure [ML5]             | PP-5   | vOC-5 | TBPY-5 | SPY-5        | JTBPY-5 |
|-----------------------------|--------|-------|--------|--------------|---------|
| <b>4<sub>Cu</sub> (Cu1)</b> | 30.483 | 1.276 | 5.404  | <b>1.039</b> | 8.364   |
| <b>4<sub>Cu</sub> (Cu2)</b> | 32.396 | 1.634 | 5.614  | <b>0.786</b> | 8.806   |
| <b>4<sub>Cu</sub> (Cu3)</b> | 30.300 | 1.189 | 5.512  | <b>0.917</b> | 8.466   |
| <b>4<sub>Cu</sub> (Cu4)</b> | 32.959 | 1.438 | 4.827  | <b>0.638</b> | 8.024   |

## S6. Diffuse reflectance results

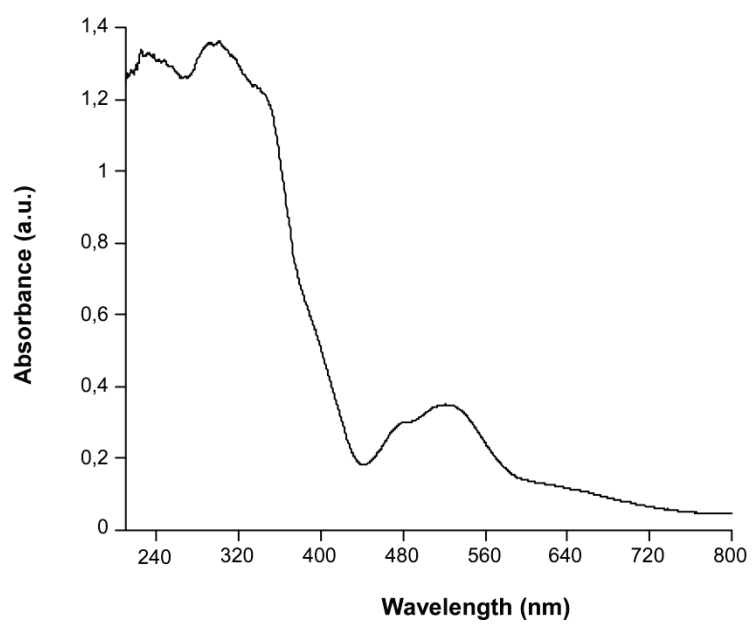

Figure S12. Diffuse reflectance spectrum for compound 2Co.

### S7. DC magnetic susceptibility measurements

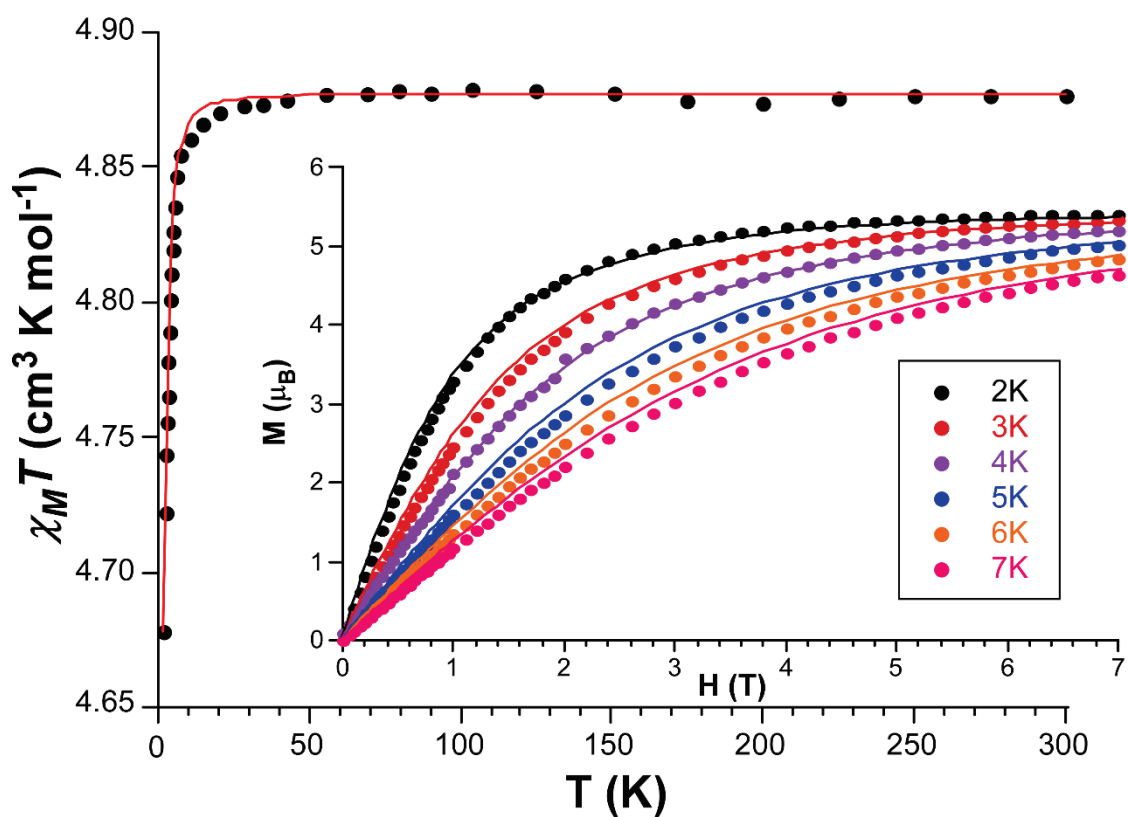

Figure S13.  $\chi_M T$  vs  $T$  and variable-temperature magnetization plots for  $1Mn$  showing the best fit according to eq.1.

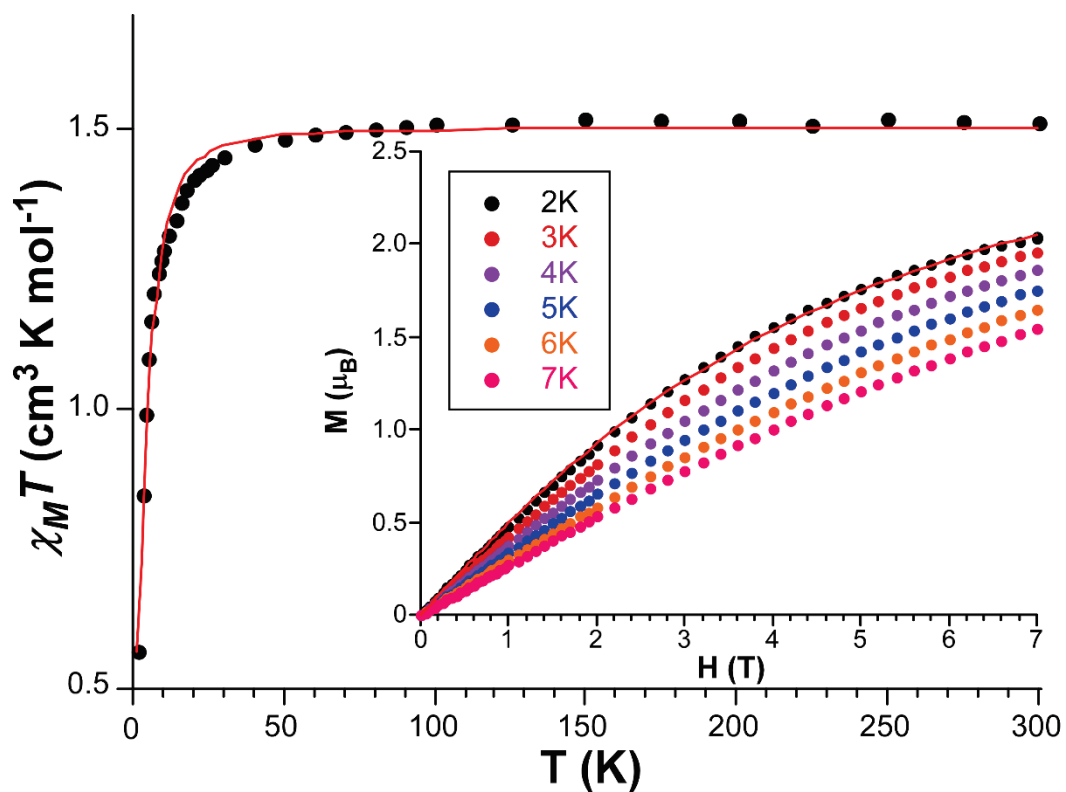

Figure S14.  $\chi_M T$  vs  $T$  and variable-temperature magnetization plots for  $3Ni$  showing the best fit according to eq.1.

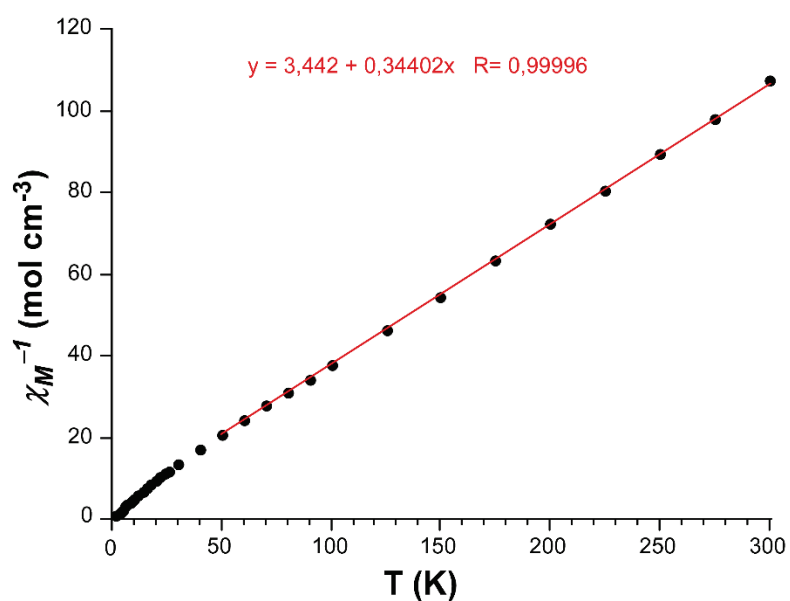

Figure S15.  $\chi_M^{-1}$  vs  $T$  of  $2C_{60}$  showing fitting of Curie-Weiss law.

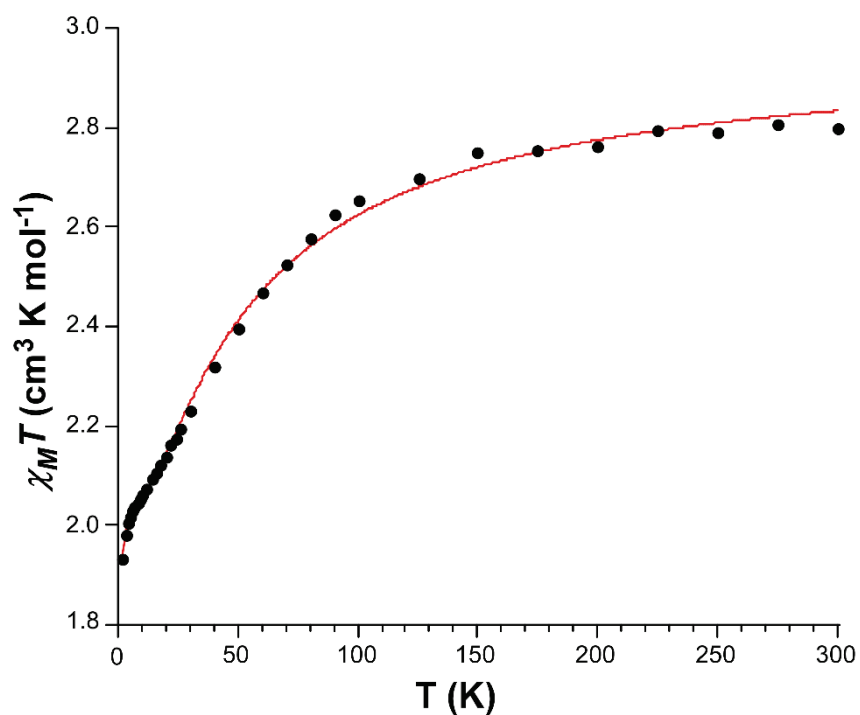

Figure S16.  $\chi_M T$  vs  $T$  plots of  $2C_{60}$  showing the best fit according to eq.3.

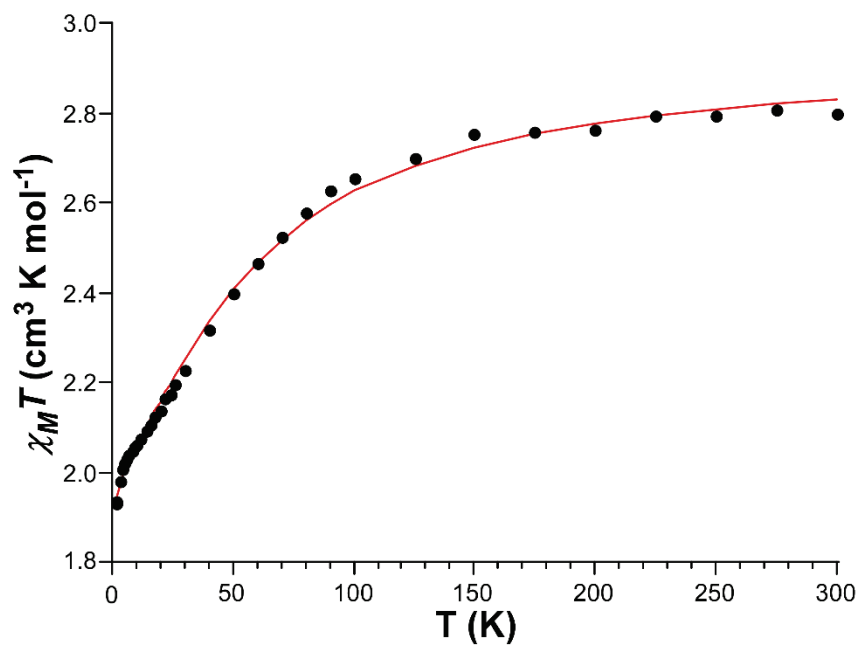

**Figure S17.**  $\chi_M T$  vs  $T$  plots of  $2Co$  showing the best fit according to eq.4 in an octahedral geometry.

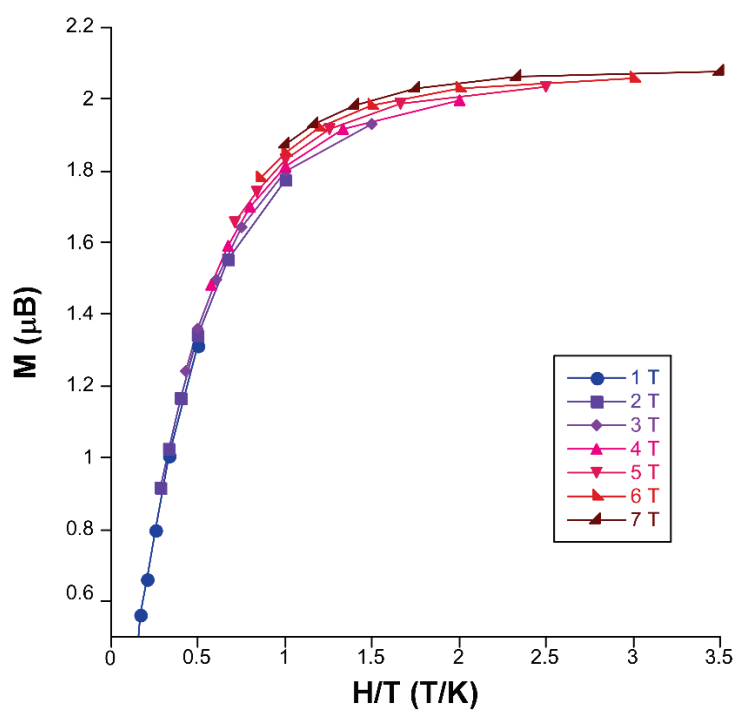

**Figure S18.** Reduced magnetization curves in the 2-7 K and 1-7 T region for compound  $2Co$ .



## S8. AC magnetic susceptibility measurements

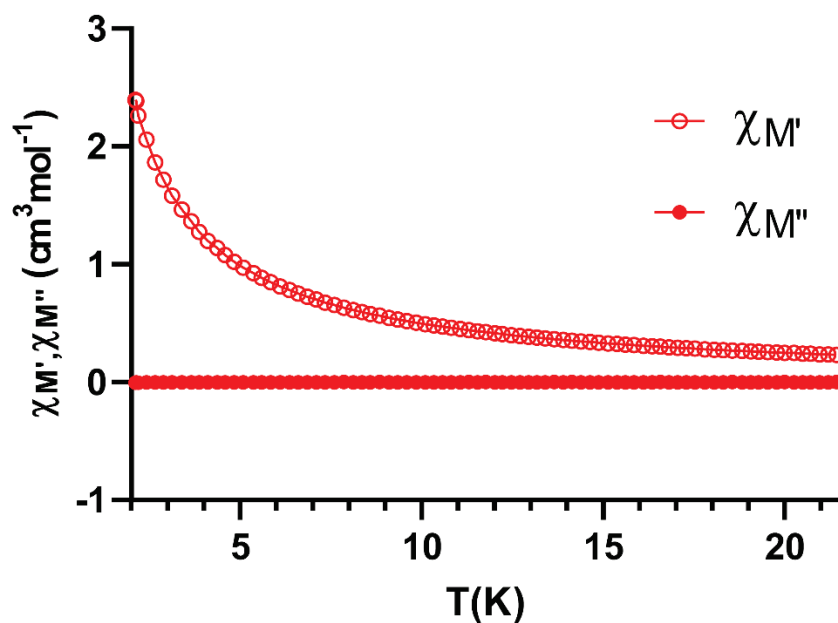

**Figure S19.**  $\chi_M'$  and  $\chi_M''$  vs  $T$  plots under  $H_{dc} = 0$  Oe and  $H_{ac} = 3.5$  Oe (frequency of 10000 Hz) for compound **1Mn**.

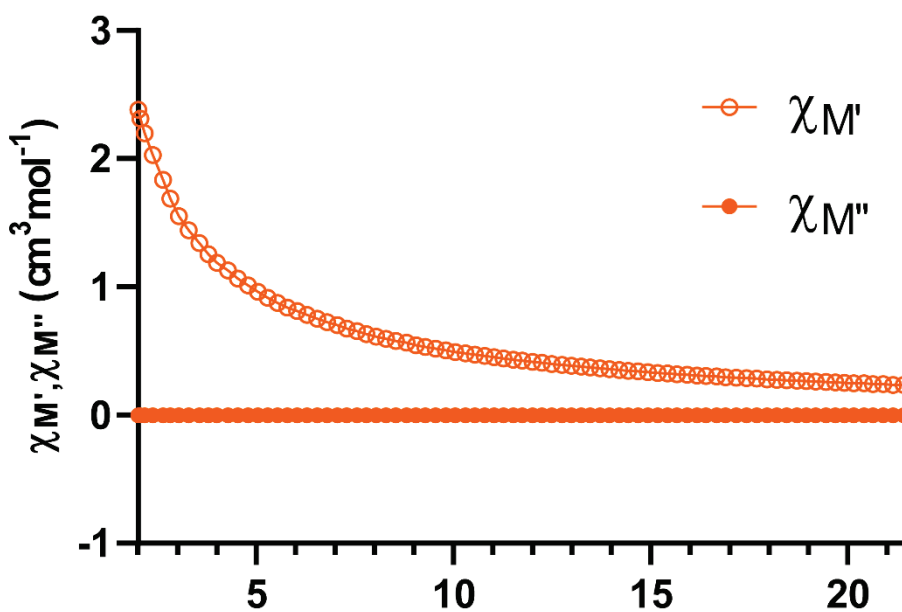

**Figure S20.**  $\chi_M'$  and  $\chi_M''$  vs  $T$  plots under  $H_{dc} = 1000$  Oe and  $H_{ac} = 3.5$  Oe (frequency of 10000 Hz) for compound **1Mn**.

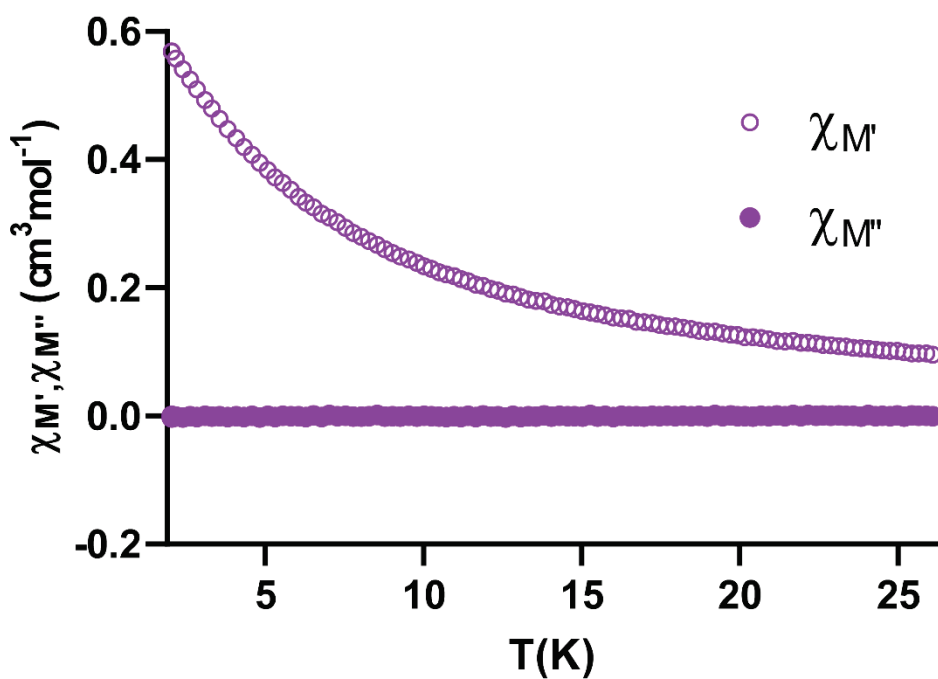

Figure S21.  $\chi_M'$  and  $\chi_M''$  vs  $T$  plots under  $H_{dc} = 0$  Oe and  $H_{ac} = 3.5$  Oe (frequency of 10000 Hz) for compound  $3_{\text{Ni}}$ .

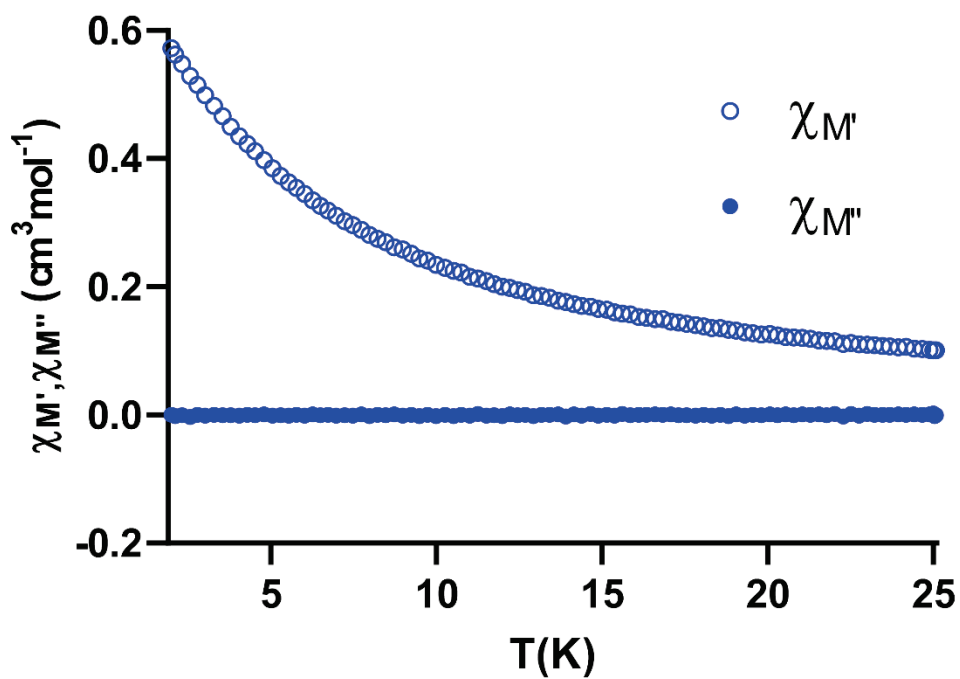

Figure S22.  $\chi_M'$  and  $\chi_M''$  vs  $T$  plots under  $H_{dc} = 1000$  Oe and  $H_{ac} = 3.5$  Oe (frequency of 10000 Hz) for compound  $3_{\text{Ni}}$ .

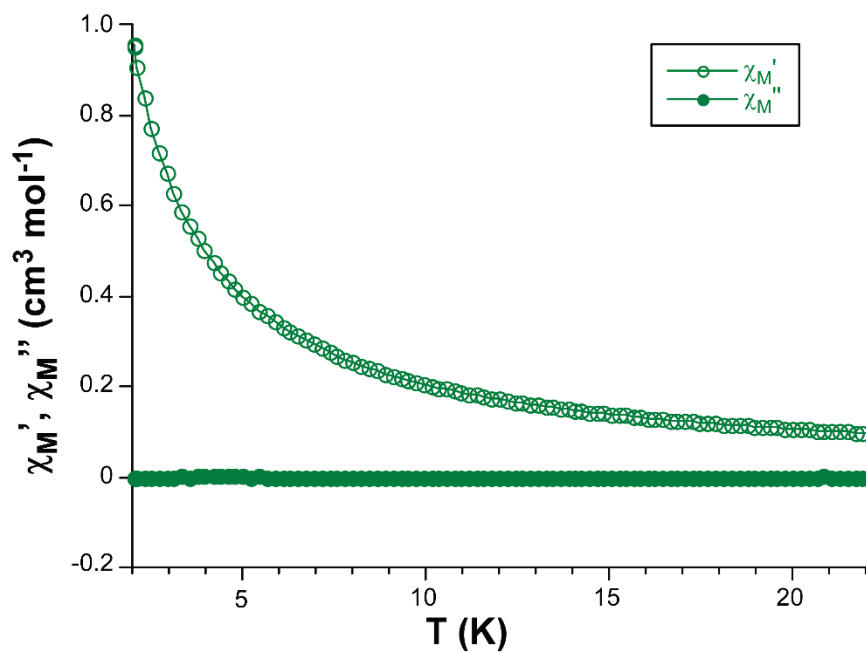

**Figure S23.**  $\chi_M'$  and  $\chi_M''$  vs  $T$  plots under  $H_{dc} = 0$  Oe and  $H_{ac} = 3.5$  Oe (frequency of 10000 Hz) for compound  $2Co$ .

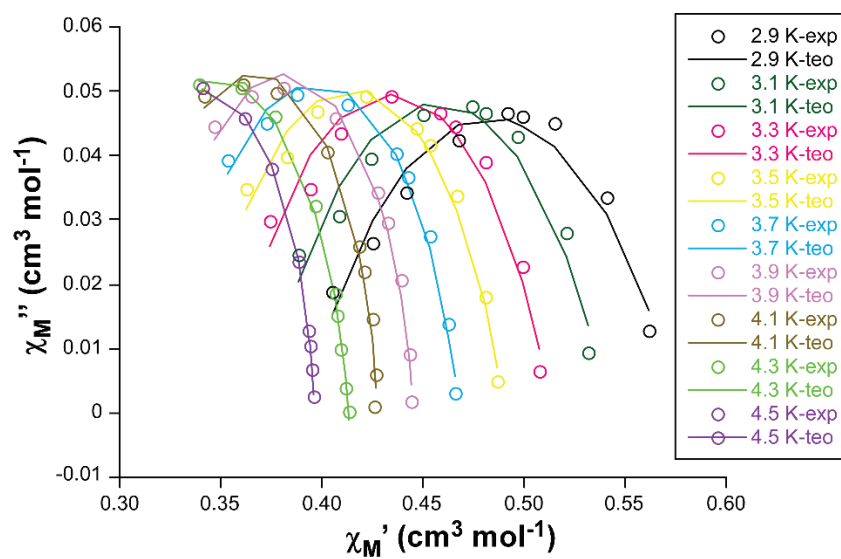

**Figure S24.** Cole-Cole plot for compound  $2Co$  in the 2.9–4.5 K range.

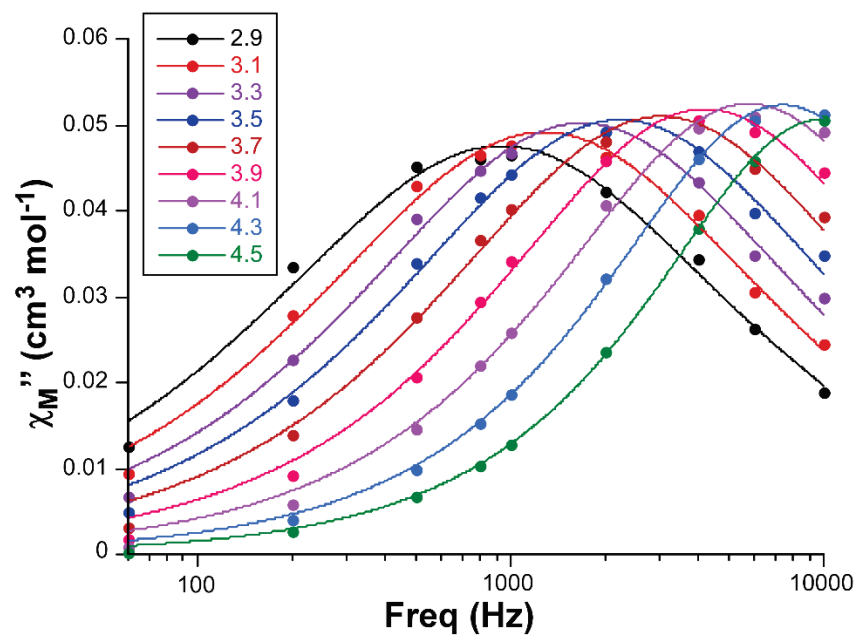

**Figure S25.** Variable-temperature frequency dependence of the  $\chi_M''$  signal of  $2C_{60}$  in the 2.9–4.5 K range showing the best fitting.

## S9. CASSCF multiconfigurational calculations.

**Table S3.** Ab initio calculated low-lying spin-orbit energy states ( $\text{cm}^{-1}$ ) for the two independent Co(II) atoms of  $2_{\text{Co}}$ .

| Co1     | Co2     |
|---------|---------|
| 0.00    | 0.00    |
| 0.00    | 0.00    |
| 198.08  | 245.96  |
| 198.08  | 245.96  |
| 765.78  | 579.63  |
| 765.78  | 579.63  |
| 1052.00 | 918.11  |
| 1052.00 | 918.11  |
| 1429.66 | 1293.86 |
| 1429.66 | 1293.86 |
| 1514.24 | 1358.92 |
| 1514.24 | 1358.92 |

**Table S4.** NEVPT2 results calculated on the H-optimized structure grown around Co2 atom of compound  $2_{\text{Co}}$ .<sup>a</sup>

|                                                              |                       |
|--------------------------------------------------------------|-----------------------|
| $D$ ( $D_{\text{KD1-2}}$ , $D_{\text{KD1-3}}$ ) <sup>b</sup> | +101.7 (+59.7, +26.6) |
| $E/D$                                                        | 0.33                  |
| $g_{xx}$ , $g_{yy}$ , $g_{zz}$                               | 1.76, 2.32, 3.09      |
| $g_{\text{iso}}$                                             | 2.39                  |
| $\Delta E$ (1-2), $\Delta E$ (1-3) <sup>c</sup>              | 245.9, 579.6          |

<sup>a</sup> Energy values are given in  $\text{cm}^{-1}$ . <sup>b</sup> The two values in parentheses after  $D$  represent the contribution to  $D$  of the ground to first and ground to second excited state transitions, respectively. <sup>c</sup> Energy separation between KDs.

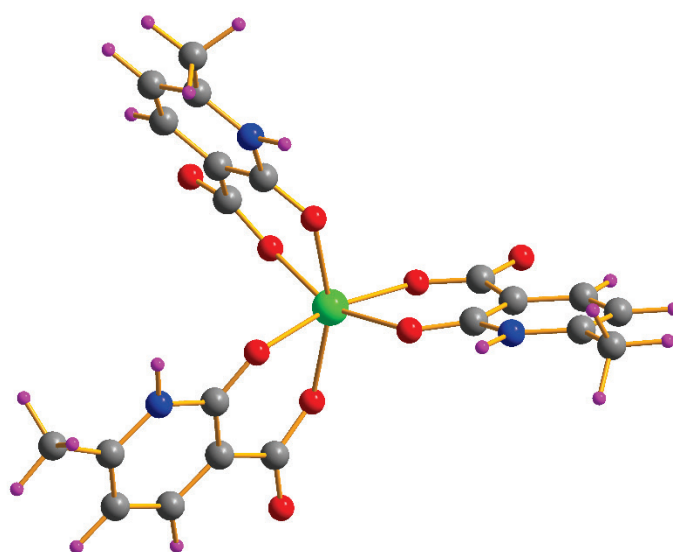

**Figure S26.** Model of  $1_{\text{Mn}}$  used for ab initio calculations.

**Table S5.** Calculated CAS(5,5)/NEVPT2 transition energies results calculated on the H-optimized model of compound **1Mn**.<sup>a</sup>

| <i>Root</i> | <i>Multiplicity</i> | $\Delta E$ ( $cm^{-1}$ ) |
|-------------|---------------------|--------------------------|
| 0           | 4                   | 20289                    |
| 1           | 4                   | 20989                    |
| 2           | 4                   | 21541                    |
| 3           | 4                   | 24600                    |
| 4           | 4                   | 24935                    |
| 5           | 4                   | 25055                    |
| 6           | 4                   | 26368                    |
| 7           | 4                   | 26382                    |
| 8           | 4                   | 26535                    |
| 0           | 2                   | 28369                    |
| 1           | 2                   | 28571                    |
| 2           | 2                   | 29586                    |
| 9           | 4                   | 29785                    |
| 10          | 4                   | 29994                    |

**Table S6.** NEVPT2 results calculated on the H-optimized model of compound **1Mn**.<sup>a</sup>

|                                                 |                      |
|-------------------------------------------------|----------------------|
| $D$ ( $D_{KD1-2}$ , $D_{KD1-3}$ ) <sup>b</sup>  | -0.04 (-0.40, -0.36) |
| $E/D$                                           | 0.31                 |
| $g_{xx}$ , $g_{yy}$ , $g_{zz}$                  | 2.00, 2.00, 2.00     |
| $g_{iso}$                                       | 2.00                 |
| $\Delta E$ (1-2), $\Delta E$ (1-3) <sup>c</sup> | 0.098, 0.173         |

<sup>a</sup> Energy values are given in  $cm^{-1}$ . <sup>b</sup> The two values in parentheses after  $D$  represent the contribution to  $D$  of the ground to first and ground to second excited state transitions, respectively. <sup>c</sup> Energy separation between KDs.

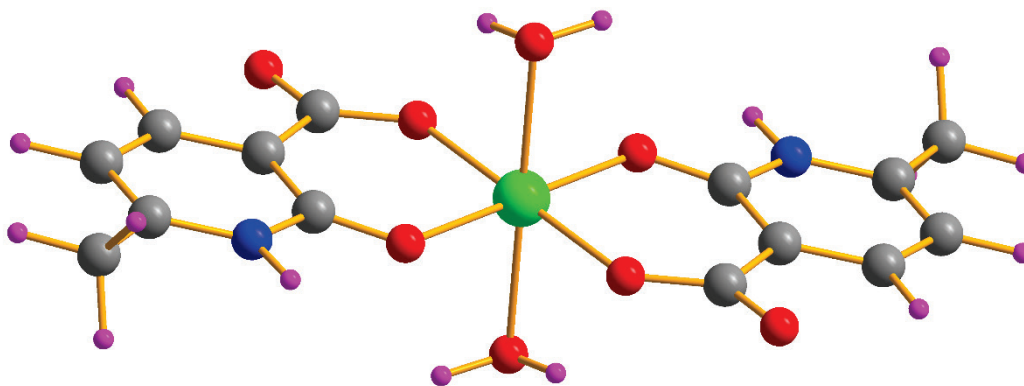

**Figure S27.** Model of **3Ni** used for ab initio calculations.

**Table S7.** Calculated CAS(8,5)/NEVPT2 transition energies results calculated on the H-optimized model of compound **3Ni**.<sup>a</sup>

| <i>Root</i> | <i>Multiplicity</i> | $\Delta E$ ( $cm^{-1}$ ) |
|-------------|---------------------|--------------------------|
| 1           | 3                   | 7155                     |
| 2           | 3                   | 7401                     |
| 3           | 3                   | 9837                     |
| 4           | 3                   | 13100                    |
| 5           | 3                   | 14220                    |
| 0           | 1                   | 14708                    |
| 6           | 3                   | 15838                    |
| 1           | 1                   | 16207                    |
| 2           | 1                   | 22475                    |
| 3           | 1                   | 22957                    |
| 7           | 3                   | 24835                    |
| 4           | 1                   | 25211                    |
| 8           | 3                   | 26568                    |
| 5           | 1                   | 27309                    |
| 6           | 1                   | 27786                    |
| 9           | 3                   | 28259                    |

**Table S8.** NEVPT2 results calculated on the H-optimized model of compound **3Ni**.<sup>a</sup>

|                                                 |                      |
|-------------------------------------------------|----------------------|
| $D$ ( $D_{KD1-2}$ , $D_{KD1-3}$ ) <sup>b</sup>  | +14.4 (+33.5, +36.9) |
| $E/D$                                           | 0.28                 |
| $g_{xx}$ , $g_{yy}$ , $g_{zz}$                  | 2.29, 2.37, 2.43     |
| $g_{iso}$                                       | 2.36                 |
| $\Delta E$ (1-2), $\Delta E$ (1-3) <sup>c</sup> | 5.19, 18.36          |

<sup>a</sup> Energy values are given in  $cm^{-1}$ . <sup>b</sup> The two values in parentheses after  $D$  represent the contribution to  $D$  of the ground to first and ground to second excited state transitions, respectively. <sup>c</sup> Energy separation between lowest-lying spin-orbit states.

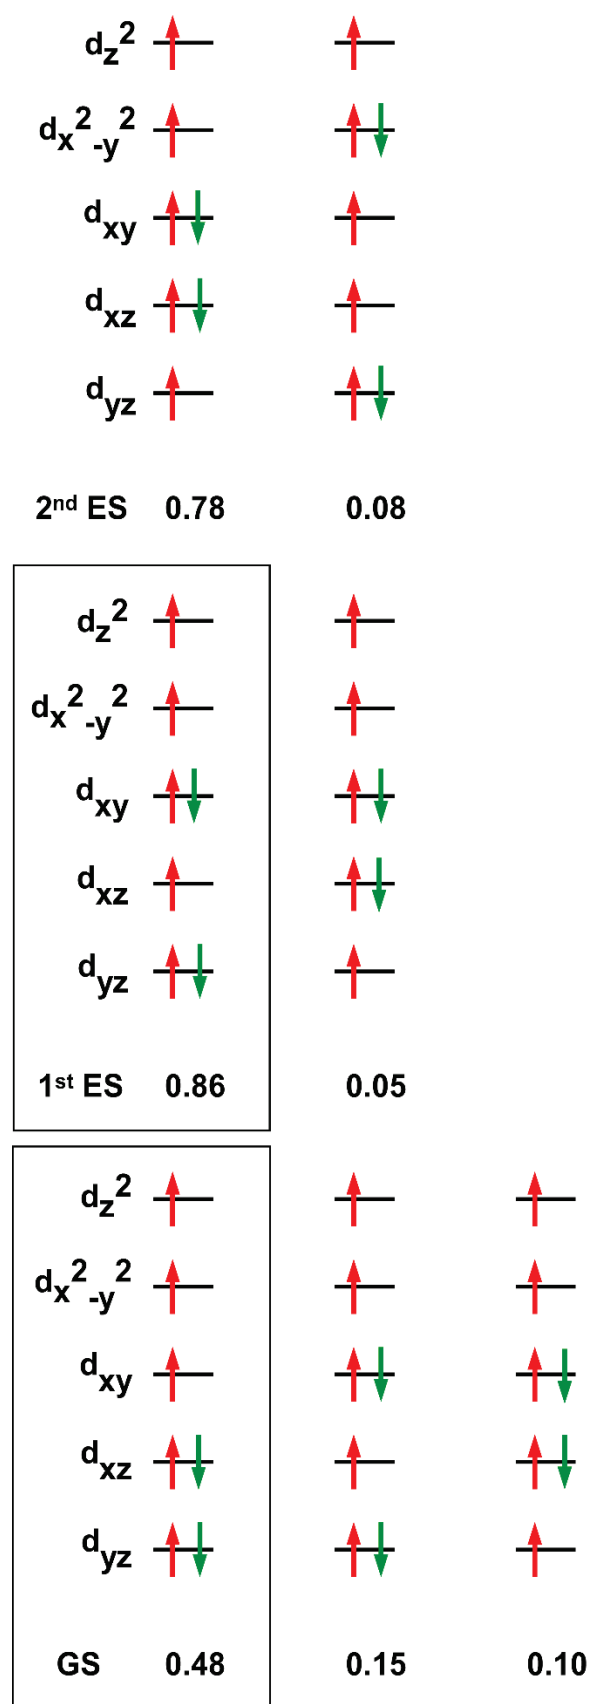

**Figure S28.** Multiconfigurational analysis of the lowest-lying states of compound **2<sub>Co</sub>** from CASSCF calculation.



### S10. DFT calculations.

DFT calculations were conducted on the two tautomeric forms of the ligand to inspect their relative stability.

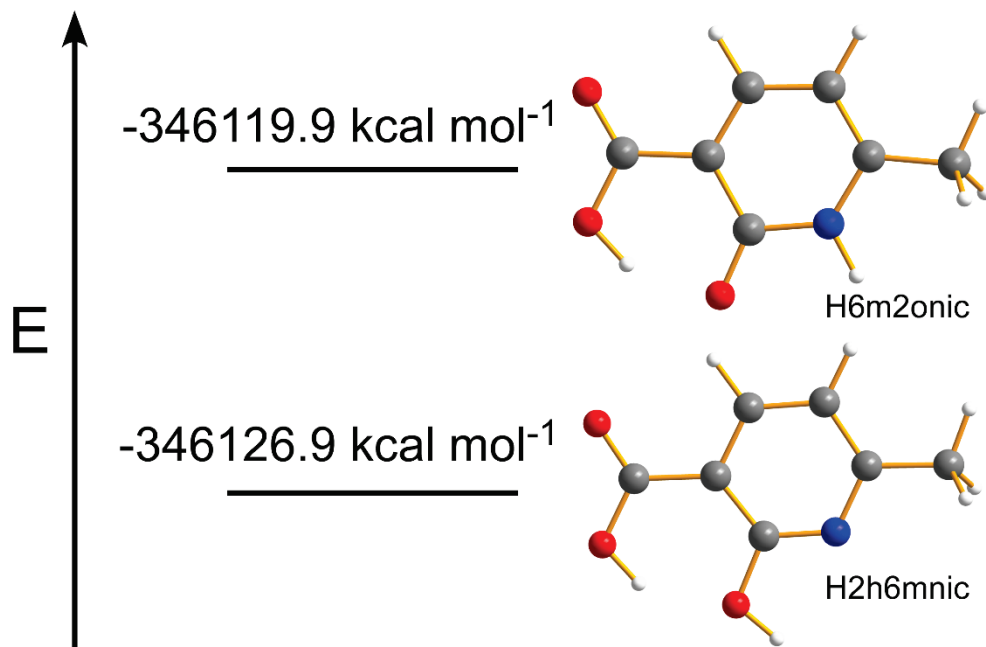

**Figure S29.** Enthalpies of the two tautomeric forms of the ligand molecule.

## S10. References

- 1 A. EARNSHAW, ed. A. B. T.-I. to M. EARNSHAW, Academic Press, 1968, pp. ix–x.
- 2 Bruker, *APEX2*, Madison, Wisconsin, USA, 2012.
- 3 G. M. Sheldrick, *SADABS empirical absorption program*, 1996.
- 4 G. M. Sheldrick, *Acta Crystallogr. Sect. A*, 2015, **71**, 3–8.
- 5 G. M. Sheldrick, *Acta Crystallogr. Sect. C*, 2015, **71**, 3–8.
- 6 G. M. Sheldrick, *Acta Cryst.*, 2014, 3–8.
- 7 L. J. Farrugia, *J. Appl. Crystallogr.*, 2012, **45**, 849–854.
- 8 J. Rodríguez-Carvajal, *Phys. B Condens. Matter*, 1993, **192**, 55–69.
